# Supplementary material
Source: PubMed Central journal article supplement (PMC9949894)
Supplement: NIHMS1628047-supplement-Supinfo.pdf [file NIHMS1628047-supplement-Supinfo.pdf]

**A.**

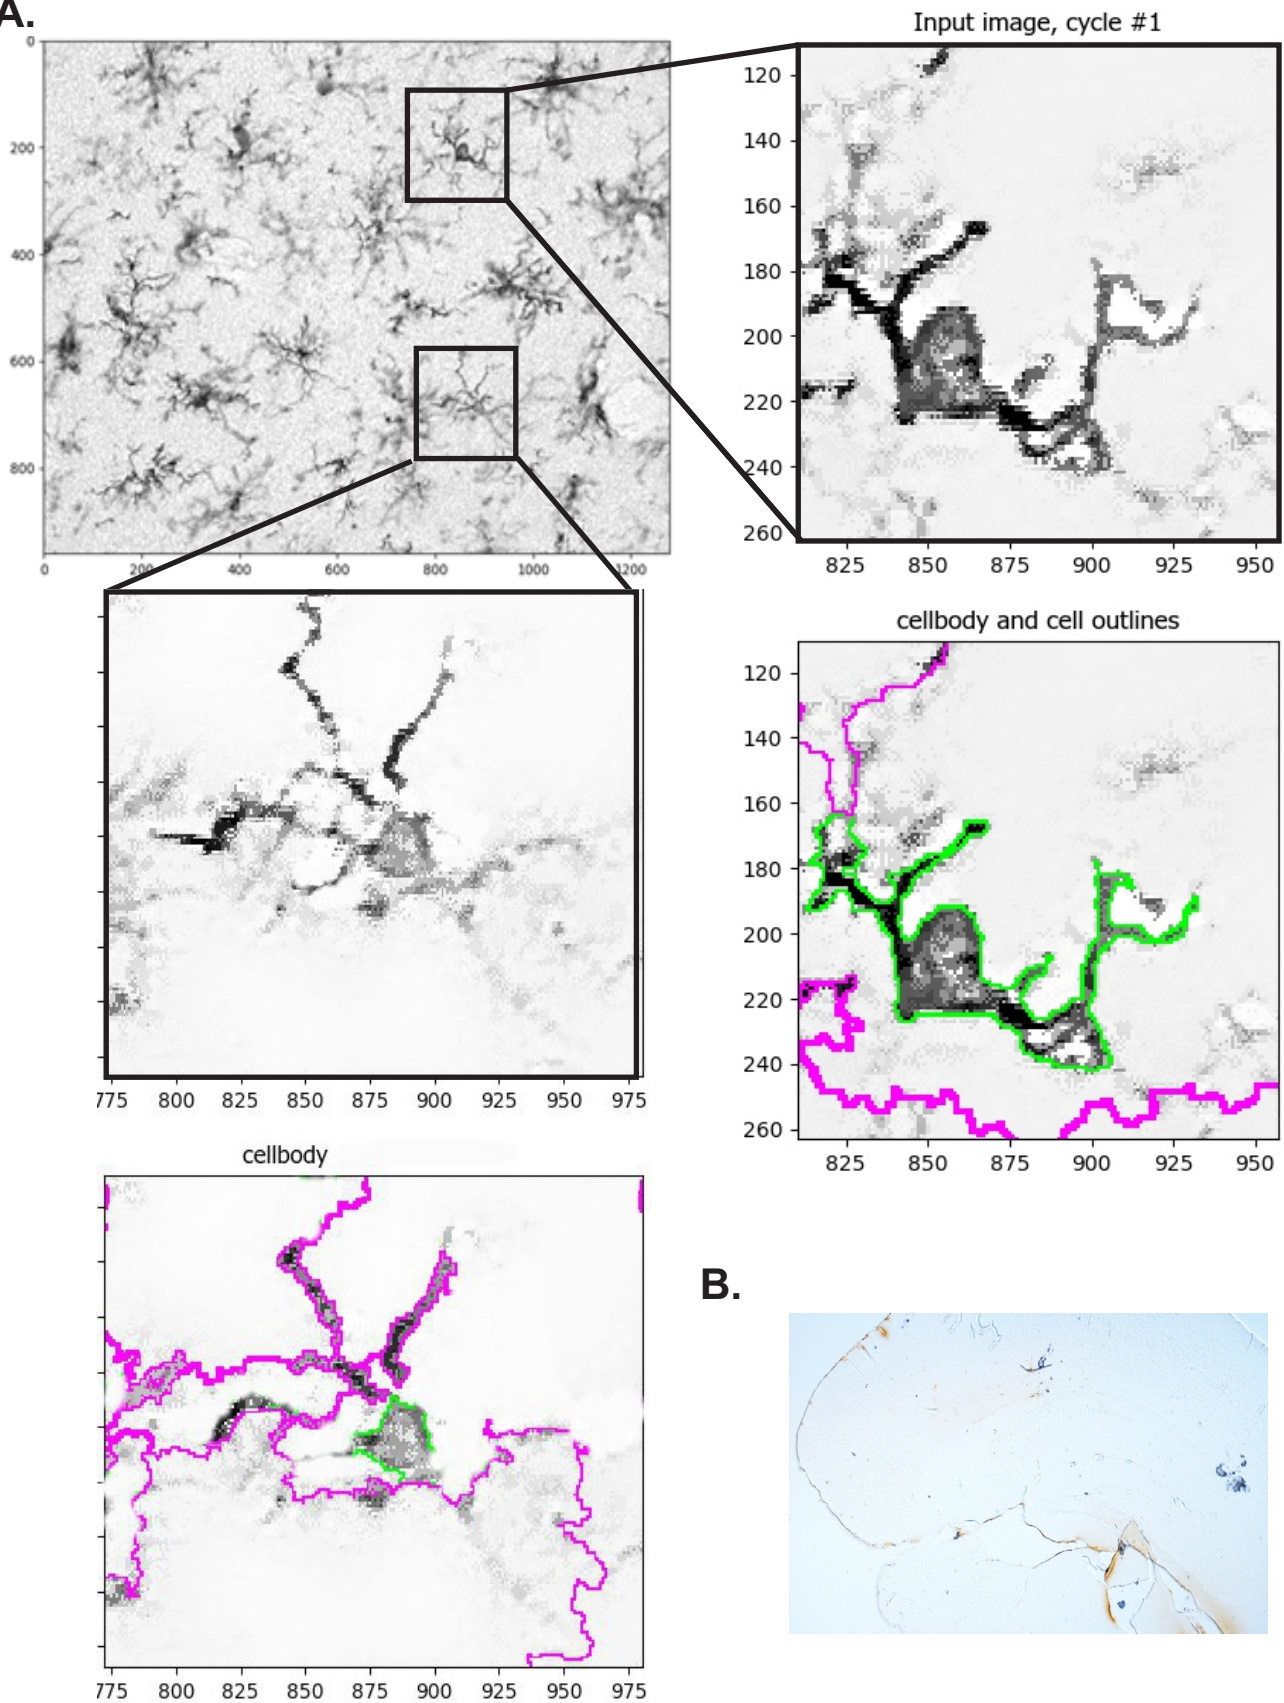

**Supplementary Figure 1.**

**A.**

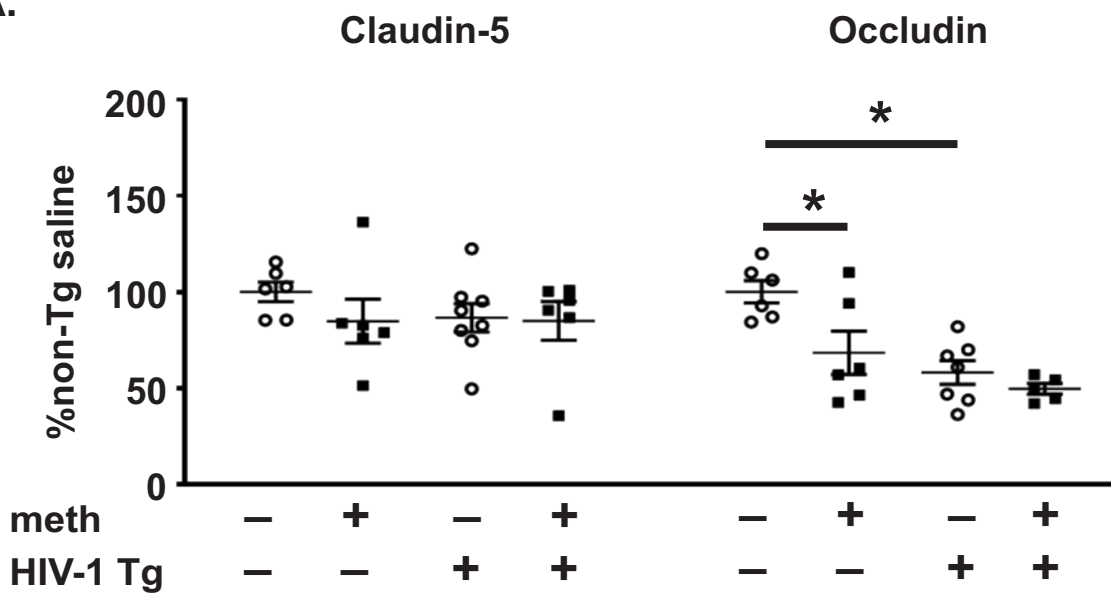

**B.**

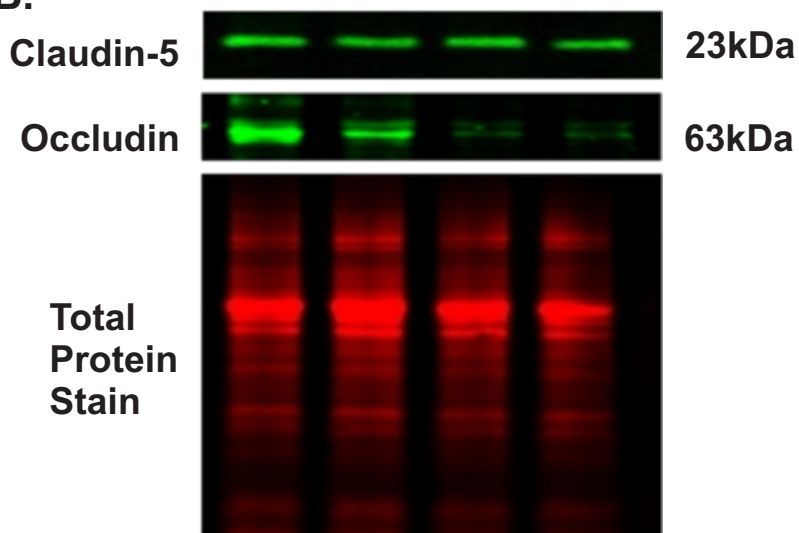

**Supplementary Figure 2.**

## Supplementary Figure Caption

Supplementary figure 1.

Identification of cellbody and cell size by cell profiler software. (A) Green color indicates objects being identified and measured. Purple colored objects are not quantified or measured. (B) Primary omit control for Iba-1 staining.

Supplementary figure 2.

Claudin-5 and occludin protein levels in nucleus accumbens. (A) Claudin-5 levels were unchanged in the nucleus accumbens of HIV-1 Tg rats irrespective of treatment. Occludin levels were reduced independently by the HIV-1 transgene and by meth. (B) Representative photomicrograph of claudin-5 and occludin.\* ANOVA indicates main effects. # indicates planned contrasts that showed differences with a Newman-Keuls *post hoc* test ( $p < 0.05$ ). n= 8/group.
